# Supplementary material
Source: Springer Nature journal article supplement (https://www.springermedizin.de/resource/supplementary/12875_2013_979_MOESM2_ESM.pdf/9435576)
Supplement: MOESM2 [file 9435576]

**Databases searched –between February 23<sup>rd</sup> & March 6th 2012**

Ovid MEDLINE(R) 1946 – Present; Embase 1974 - 2012 March 05  
Web of Knowledge 1899-2012; Campbell collaboration  
PsycINFO 1806- Feb Week 4 2012; and CINAHL

Titles and abstract identified and screened  
**n=8,520**

**Excluded n= 1,697**

Incidence, survival Screening, drug,  
treatment, co-morbidity & pathology,

**Excluded n= 1,739**

Published before year 2000

**Excluded n= 3,660**

Duplicates

**Excluded n= 1,393**

Conducted in USA, China, India,  
Malaysia and other developing  
countries

Full-text articles assessed for eligibility  
**n = 31**

**Excluded n= 14**

America n=6 Mexico n=1 Testing n=1  
Delay scale n=1 Unobtainable n=1  
childhood n=1 info seeking n=1  
Social relation n=1 specialist referral n=1

**Excluded n= 10**

Incidence n=1 Survival n= 2  
Screening n=1 Referral routes n=2  
Late stage n=2 Risk of delay n=2

Number of studies included in the review  
**n= 7**
